# Supplementary material
Source: publisher figshare collection journal article supplement (https://frontiersin.figshare.com/ndownloader/files/14088149)
Supplement: Supplementary file [file 14088149]

**Supplemental table 1.** List of seed embryos used in this study indicating the Order, Family and the name for each Species.

| Order                 | Family         | Species                       | Endodermis <sup>a</sup> | Cortex <sup>a</sup> | Protodermis <sup>a</sup> |
|-----------------------|----------------|-------------------------------|-------------------------|---------------------|--------------------------|
| <b>Brassicales</b>    | Brassicaceae   | <i>Arabidopsis thaliana</i>   | X                       |                     |                          |
|                       | Brassicaceae   | <i>Camelina sativa</i>        | X                       | X                   |                          |
|                       | Brassicaceae   | <i>Nasturdium officinale</i>  | X                       | X                   |                          |
|                       | Brassicaceae   | <i>Lepidium sativum</i>       | X                       | X                   |                          |
|                       | Brassicaceae   | <i>Brassica napus</i>         | X                       | X                   |                          |
|                       | Cleomaceae     | <i>Cleome hassleriana</i>     | X                       | X                   |                          |
|                       | Capparaceae    | <i>Capparis spinosa</i>       | X                       | X                   |                          |
|                       | Caricaceae     | <i>Vasconcellea pubescens</i> | X                       | X                   |                          |
| <b>Sapindales</b>     | Rutaceae       | <i>Ruta graveolens</i>        | X                       | X                   |                          |
| <b>Rosales</b>        | Rosaceae       | <i>Pyrus communis</i>         | X                       | X                   |                          |
| <b>Zygophyllales</b>  | Porlieria      | <i>Porlieria chilensis</i>    | X                       | X                   |                          |
| <b>Solanales</b>      | Solanaceae     | <i>Capsicum annuum</i>        | X                       | X                   |                          |
|                       | Solanaceae     | <i>Solanum lycopersicum</i>   | X                       | X                   | X                        |
| <b>Asterales</b>      | Asteraceae     | <i>Lactuca sativa</i>         | X                       | X                   | X                        |
| <b>Caryophyllales</b> | Polygonaceae   | <i>Rumex acetosa</i>          | X                       | X                   | X                        |
|                       | Polygonaceae   | <i>Rheum rhaponticum</i>      | X                       | X                   |                          |
|                       | Polygonaceae   | <i>Fagopyrum esculentum</i>   | X                       | X                   |                          |
|                       | Phytolaccaceae | <i>Phytolacca dioica</i>      | X                       | X                   |                          |
|                       | Amaranthaceae  | <i>Chenopodium quinoa</i>     | X                       | X                   |                          |
|                       | Amaranthaceae  | <i>Spinacia oleracea</i>      | X                       | X                   |                          |
|                       | Amaranthaceae  | <i>Beta vulgaris</i>          | X                       | X                   |                          |
| <b>Canellales</b>     | Winteraceae    | <i>Drimys winteri</i>         | X                       | X                   | X                        |

<sup>a</sup>Letter X indicates detectable iron by Perls/DAB staining for each cell layer.
